# Supplementary material for: Advances in representing interactive methane in ModelE2-YIBs (version 1.1)
Source: Copernicus journal article supplement (doi:10.5194/gmd-11-4417-2018), 2018-11-02
Supplement: Supplementary file 1 [file gmd-11-4417-2018-supplement.zip]

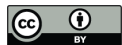

## *Supplement of*

# **Advances in representing interactive methane in ModelE2-YIBs (version 1.1)**

**Kandice L. Harper et al.**

*Correspondence to:* Kandice L. Harper ([harper.kandice@gmail.com](mailto:harper.kandice@gmail.com)) and Nadine Unger ([n.unger@exeter.ac.uk](mailto:n.unger@exeter.ac.uk))

- gmd-11-4417-2018-supplement-title-page.pdf
- DATASET\_FIGURE1.csv
- DATASET\_FIGURE2.csv
- DATASET\_FIGURE3.csv
- DATASET\_FIGURE5\_MEANS.csv
- DATASET\_FIGURE5\_SD.csv
- DATASET\_FIGURE6.csv
- DATASET\_FIGURE7.csv
- DATASET\_OCEAN\_LAKE\_GEOL\_CH4\_EMISSIONS.csv
- DATASET\_WETLAND\_CH4\_EMISSIONS.csv
- README\_DATASETS.rtf
- Supplemental\_Information.pdf
- \_\_MACOSX
  - .\_DATASET\_FIGURE1.csv
  - .\_DATASET\_FIGURE2.csv
  - .\_DATASET\_FIGURE3.csv
  - .\_DATASET\_FIGURE5\_MEANS.csv
  - .\_DATASET\_FIGURE5\_SD.csv
  - .\_DATASET\_FIGURE6.csv
  - .\_DATASET\_FIGURE7.csv
  - .\_DATASET\_OCEAN\_LAKE\_GEOL\_CH4\_EMISSIONS.csv
  - .\_DATASET\_WETLAND\_CH4\_EMISSIONS.csv
  - .\_Supplemental\_Information.pdf

The copyright of individual parts of the supplement might differ from the CC BY 4.0 License.
