# Supplementary material for: Advances in representing interactive methane in ModelE2-YIBs (version 1.1)
Source: Copernicus journal article supplement (doi:10.5194/gmd-11-4417-2018), 2018-11-02
Supplement: Supplementary file 2 [file gmd-11-4417-2018-supplement.zip]

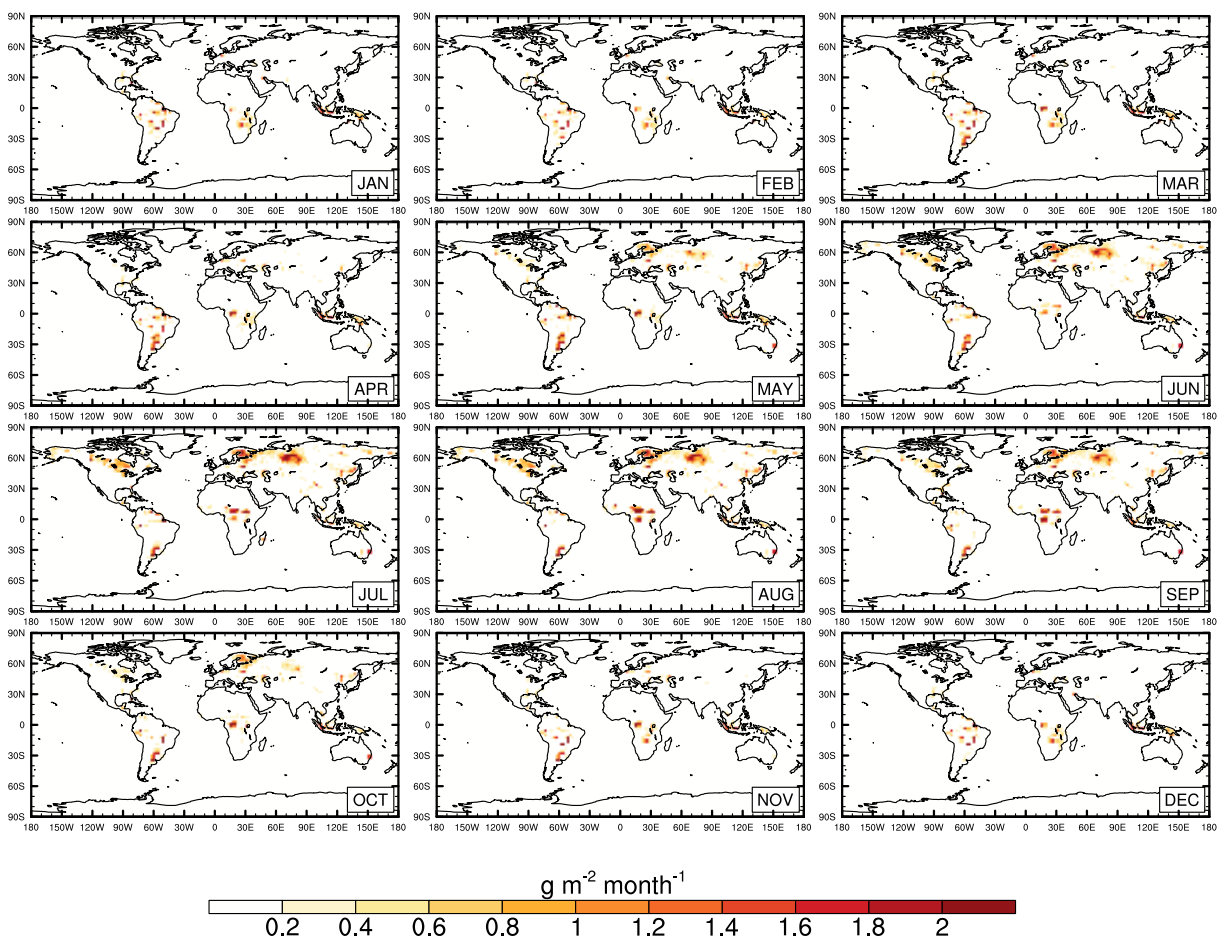

**Figure S1:** Monthly methane emissions from wetlands ( $\text{g CH}_4 \text{ m}^{-2} \text{ month}^{-1}$ ).

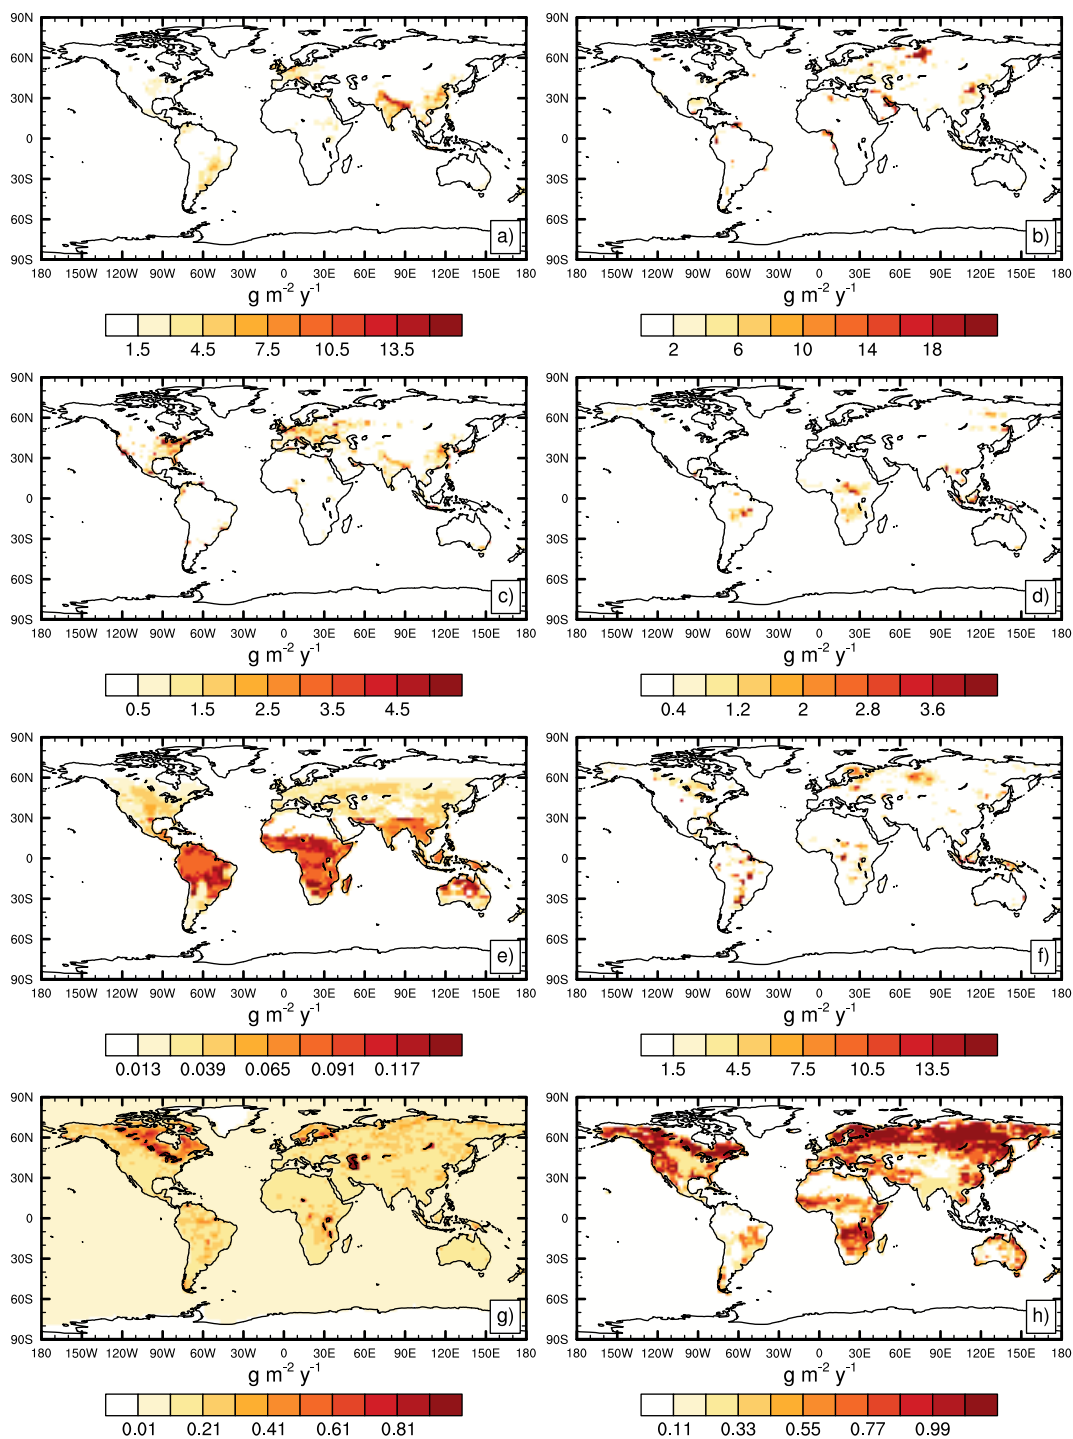

**Figure S2:** Annual methane fluxes ( $\text{g CH}_4 \text{ m}^{-2} \text{y}^{-1}$ ) as: a) sum of agriculture and agricultural waste burning emissions; b) sum of domestic, energy, industrial, shipping, and transportation emissions; c) waste emissions; d) biomass burning emissions; e) termite emissions; f) wetland emissions; g) sum of marine, terrestrial geological, and lake emissions; and h) soil uptake (positive values indicate magnitude of methane loss to soils).

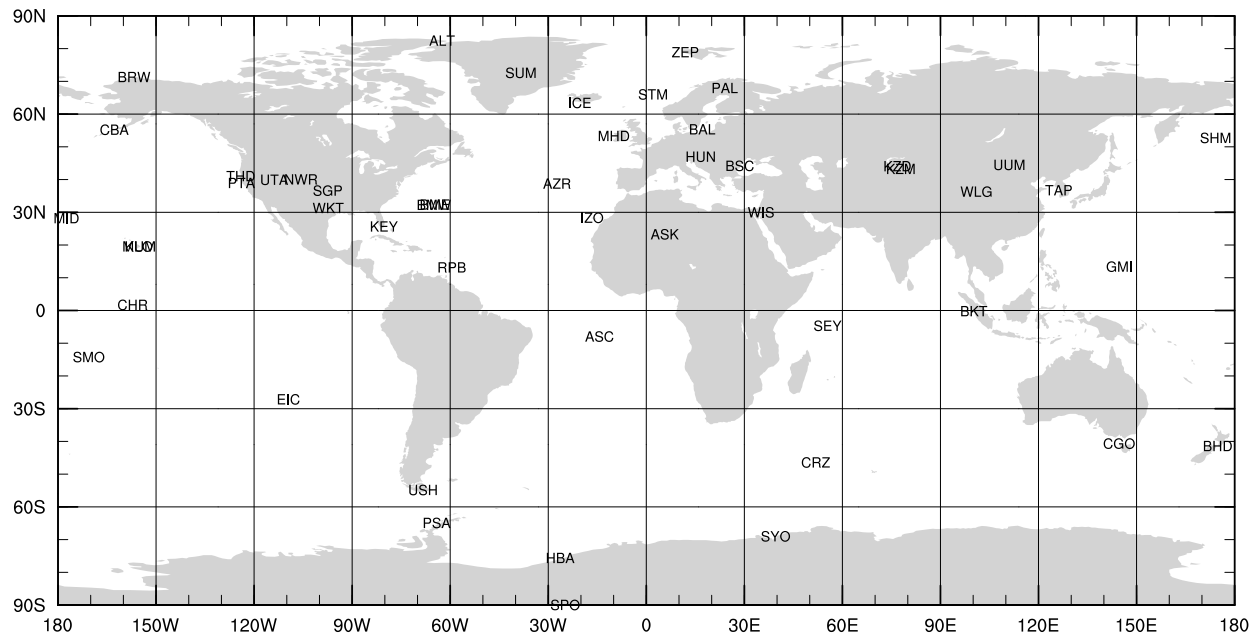

**Figure S3:** The geographic locations of the 50 measurement stations from the NOAA ESRL global air-sampling network (Dlugokencky et al., 2015) used for the model–measurement comparison of surface methane concentrations. On the map, each station is identified by its 3-letter code; the full station names are available in Fig. 5. For clarity, the two stations near 20° N, 155° W are the Hawaiian sites Mauna Loa (MLO) and Cape Kumukahi (KUM); those near 32° N, 65° W are the Bermudian sites Tudor Hill (BMW) and St. Davids Head (BME); and those near 44° N, 77° E are the Kazakhstani sites Sary Taukum (KZD) and Plateau Assy (KZM).

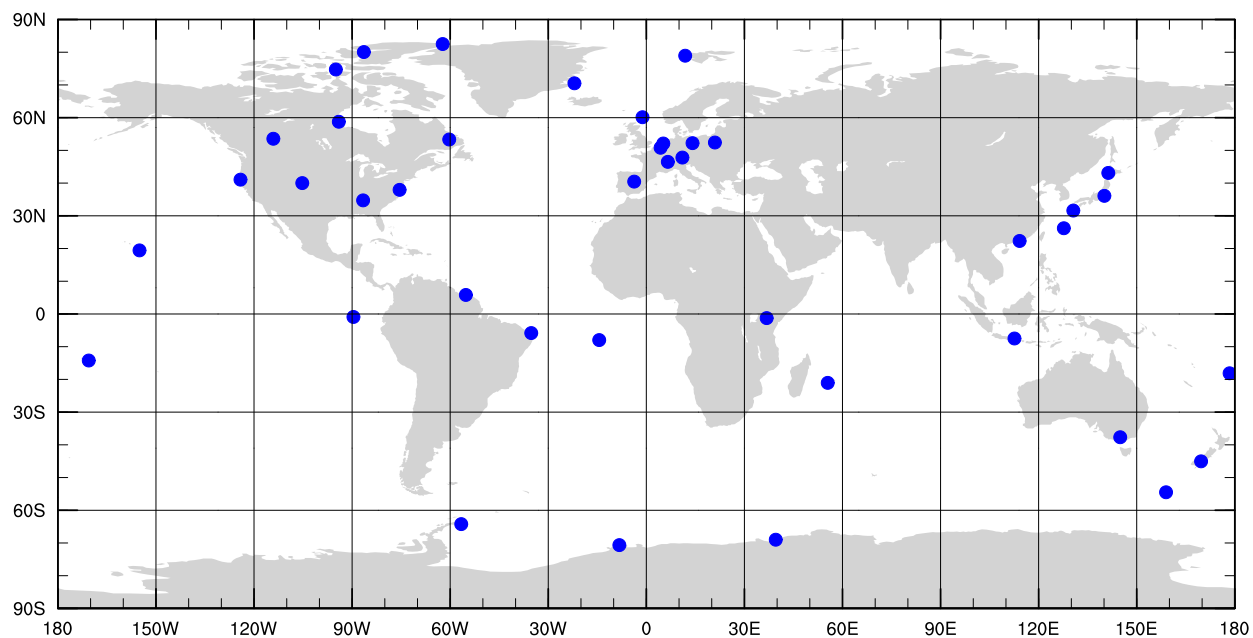

**Figure S4:** The geographic locations of the 41 measurement stations associated with the ozonesonde climatology (Tilmes et al., 2012) used for the model–measurement comparison of ozone.
